# Supplementary material
Source: PubMed Central journal article supplement (PMC6693836)
Supplement: jciinsight-4-127552-s116.pdf [file jciinsight-4-127552-s116.pdf]

Gbenedio et al., Supplemental Figure 1

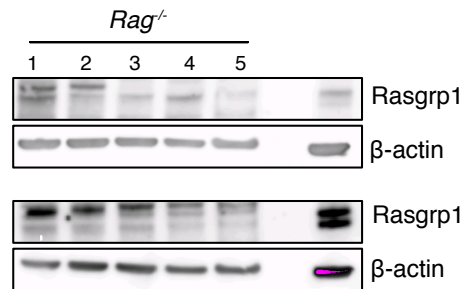

**Supplemental Figure 1: Detection of Rasgrp1 in intestinal epithelial cells in different part of small intestine and colon.**

Detection of RasGRP1 expression by western blot in different sections of small intestine (duodenum (1), Jejunum (2) and ileum (3)) and colon (proximal (4) and distal (5)) of a *Rag1<sup>-/-</sup>* mouse. Western blot panels are independent experiments and extraction confirming the observation in the experiment presented in Figure 1C. β-Actin serves as protein loading control. Protein lysate from CD4-positive mouse T cells (C57Bl6 mouse) is used as positive control for Rasgrp1.

Gbenedio et al., Supplemental Figure 2

Supplemental Figure 2A

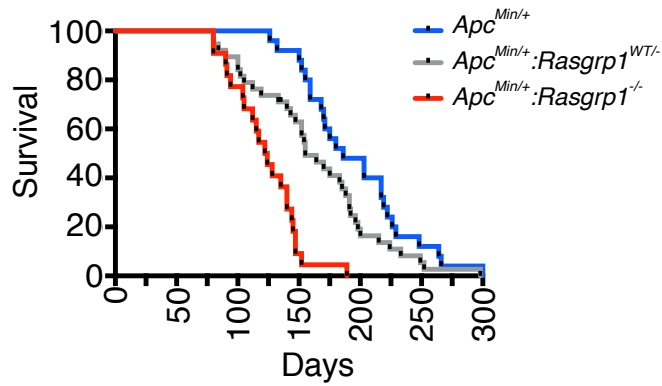

Supplemental Figure 2B

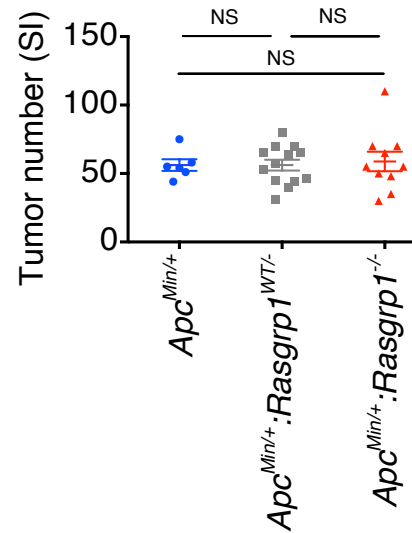

Supplemental Figure 2C

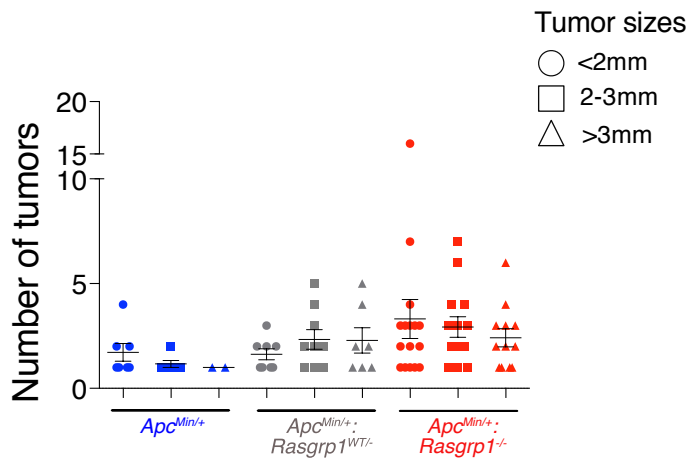

Supplemental Figure 2: RasGRP1 acts as a tumor suppressor in  $Apc^{Min}$  mice.

(A) Kaplan–Meier curves of  $Apc^{Min/+}$  mouse survival with different copies of  $Rasgrp1$  alleles. Statistical analysis was performed on  $Apc^{Min/+};Rasgrp1^{WT/-}$  (n = 37) and  $Apc^{Min/+};Rasgrp1^{-/-}$  (n = 22) compared to  $Apc^{Min/+}$  mice (n = 25). \*\*\*\*  $p < 0.0001$ , Log-

rank (Mantel-Cox) Test, which means that the three groups are significantly different from each other. Over the course of the studies we had to sacrifice  $n = 23$   $Apc^{Min/+}Rasgrp1^{-/-}$  mice with rectal prolapse in compliance with IACUC regulation. Note that these early time point euthanizations were not counted towards Figure 1F. **(B)** Quantification of tumor numbers in the small intestine (SI) of  $Apc^{Min/+}$  ( $n = 6$ ),  $Apc^{Min/+}:Rasgrp1^{WT/-}$  ( $n = 13$ ) and  $Apc^{Min/+}:Rasgrp1^{-/-}$  ( $n = 9$ ) mice. NS = not significant. **(C)** Quantification of colonic tumor number grouped by sizes (circle  $< 2$ mm; square 2-3mm and triangle  $> 3$ mm) in  $Apc^{Min/+}$  (blue symbols),  $Apc^{Min/+}:Rasgrp1^{WT/-}$  (gray symbols) and  $Apc^{Min/+}:Rasgrp1^{-/-}$  (red symbols) mice ( $n = 10, 15$  and  $19$  respectively). Depicted are colonic tumors in individual mice that correspond to the percentages in figure 1I. Note that we decided not to perform statistical analyses here.  $Apc^{Min/+}$  mice infrequently develop colonic tumors so we have few data points here. Furthermore,  $Apc^{Min/+}:Rasgrp1^{WT/-}$  and  $Apc^{Min/+}:Rasgrp1^{-/-}$  mice succumb from disease at earlier age, so these tumor numbers do not correspond to mice of the same ages.

Gbenedio et al., Supplemental Figure 3

Supplemental Figure 3A

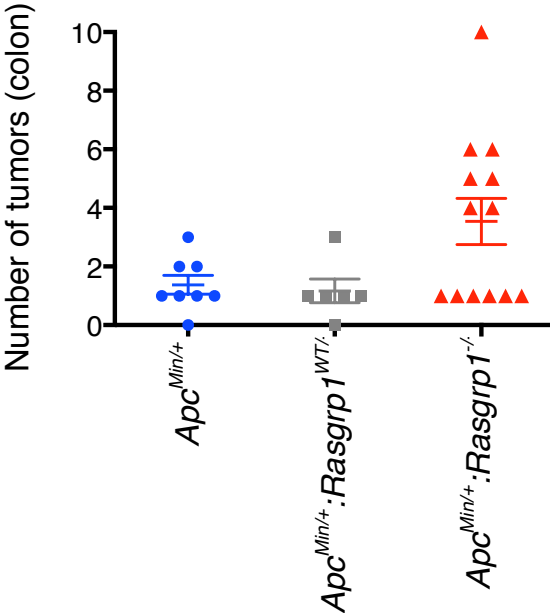

Supplemental Figure 3B

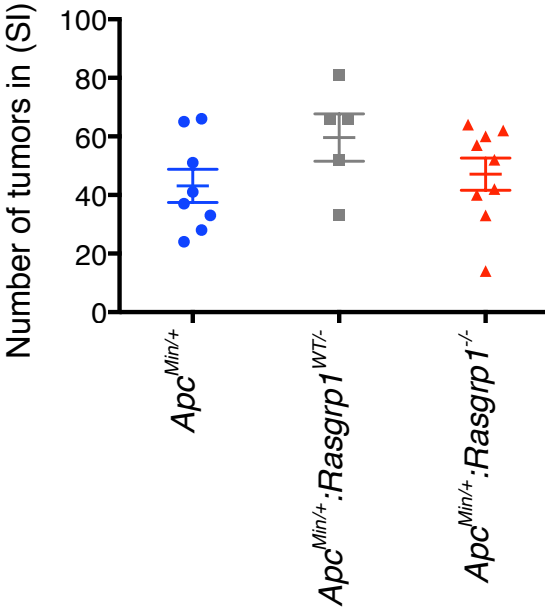

**Supplemental Figure 3: Bone marrow reconstitutions do not diminish colonic tumors in *Apc<sup>Min/+</sup>:Rasgrp1<sup>-/-</sup>* mice.** (A) Quantification of colonic tumor incidence in *Apc<sup>Min/+</sup>*, *Apc<sup>Min/+</sup>:Rasgrp1<sup>WT/-</sup>* and *Apc<sup>Min/+</sup>:Rasgrp1<sup>-/-</sup>* mice that were reconstituted with bone marrow from wildtype mice (n = 8, 6 and 12 respectively). (B) Quantification of tumor numbers in the small intestine (SI) of *Apc<sup>Min/+</sup>* (n = 8), *Apc<sup>Min/+</sup>:Rasgrp1<sup>WT/-</sup>* (n = 5) and *Apc<sup>Min/+</sup>:Rasgrp1<sup>-/-</sup>* (n = 9) mice that were reconstituted with bone marrow from wildtype mice. NS = not significant.

Gbenedio et al., Supplemental Figure 4

Supplemental figure 4A

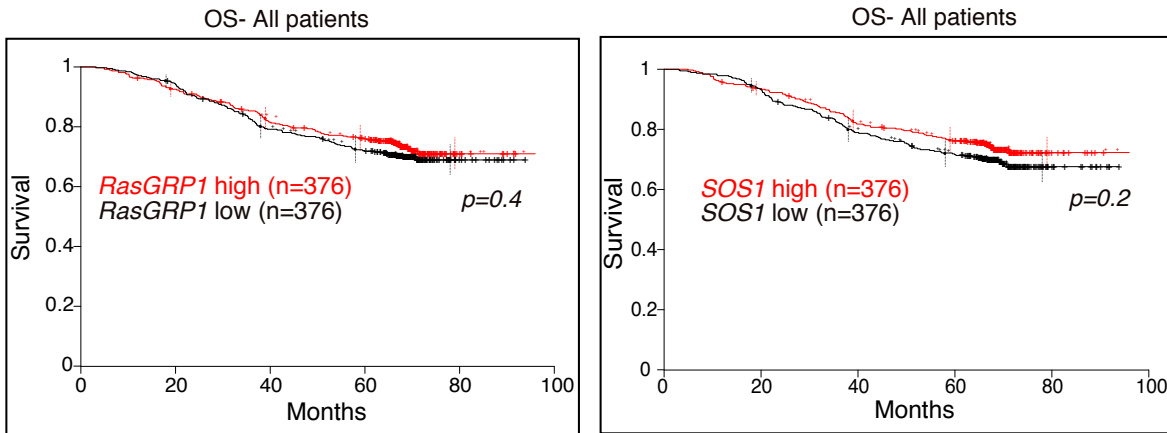

Supplemental figure 4B

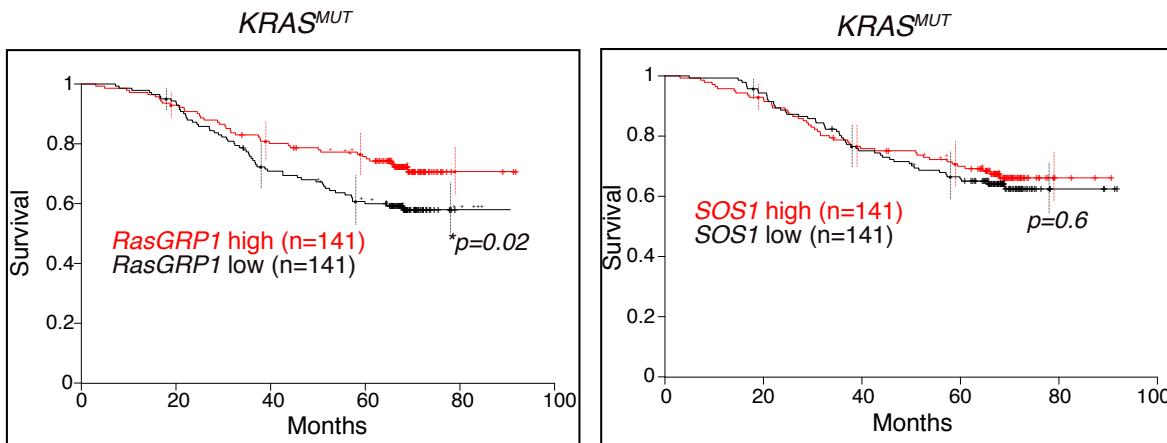

Supplemental figure 4C

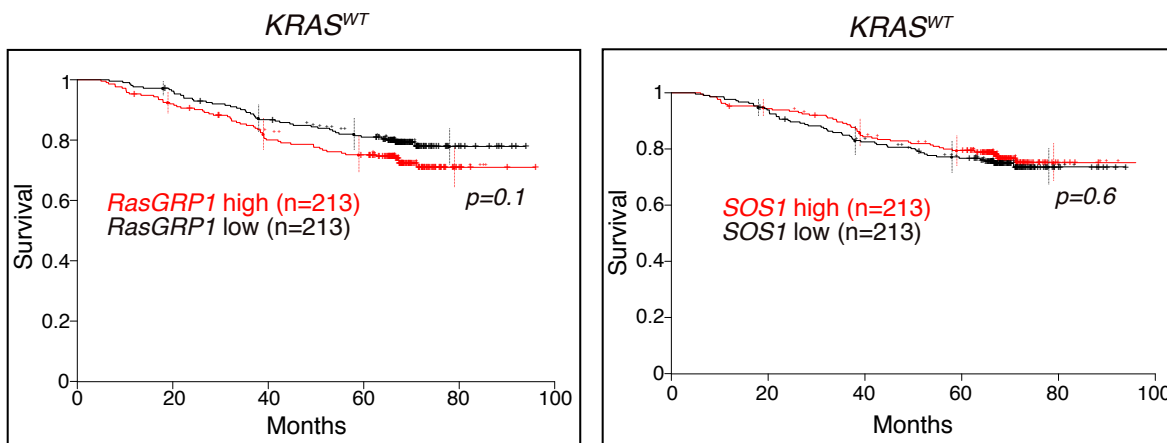

**Supplemental Figure 4: Kaplan Meier curve of CRC patients with low and high *RasGRP1* or *SOS1* in PETACC3.**

Kaplan–Meier survival curve for stage II and III PETACC3 CRC patients (n=752). For each analysis patients were divided in two equal groups. Panel a presents overall survival for all patients (n=376 per group high and low expression). Panel b and c represent either *KRAS*<sup>MUT</sup> (n=141/group)- or *KRAS*<sup>WT</sup> (n=213/group)-carrying patients, respectively. All left panels show *RasGRP1* expression level plotted against patient survival and all right panels *SOS1* expression plotted against patient survival. All red lines represent high expression of gene of interest black lines low expression level in patient samples. All statistical analysis were done using *Log-rank (Mantel-Cox) Test*. \**p* < 0.05.

Gbenedio et al., Supplemental Figure 5

Supplemental figure 5A

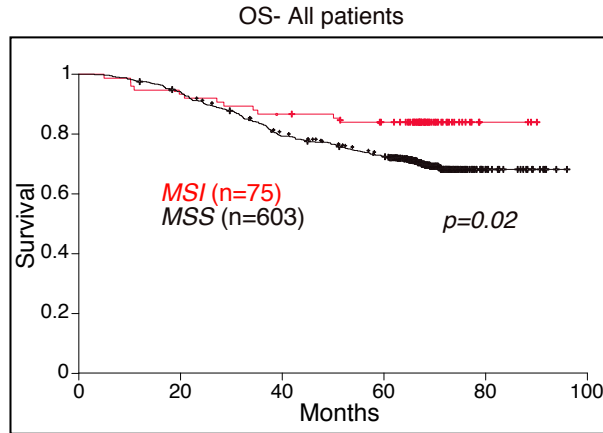

Supplemental figure 5B

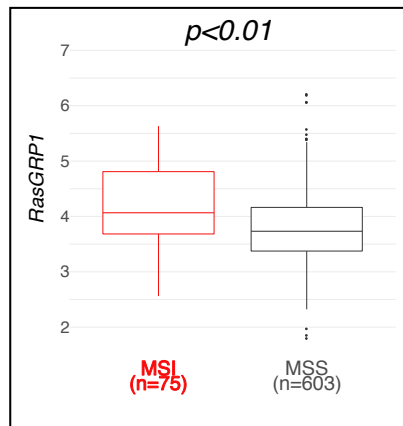

Supplemental figure 5C

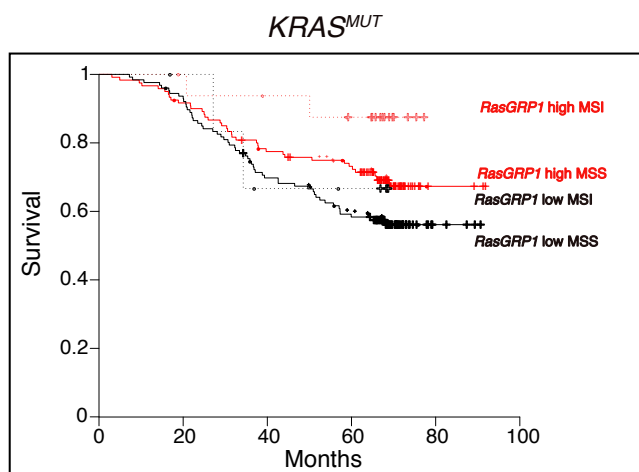

RasGRP1 high, MSI vs RasGRP1 high, MSS  
 $p = 0.2$

RasGRP1 high, MSI vs RasGRP1 low, MSS  
 $p = 0.05$

RasGRP1 high, MSS vs RasGRP1 low, MSI  
 $p = 0.9$

RasGRP1 high, MSS vs RasGRP1 low, MSS  
 $p = 0.06$

RasGRP1 high, MSI vs RasGRP1 low, MSI  
 $p = 0.3$



**Supplemental Figure 5: Impact of RasGRP1 level in CRC patients with microsatellite instability (MSI) versus microsatellite stable (MSS).**

**(A)** Kaplan–Meier survival curve for stage II and III PETACC3 CRC patients (n=678). Patients were divided in two groups of MSI (n=75) versus MSS (n=603). **(B)** Patients from panel A in Box plot comparing *RasGRP1* expression level in patients MSS and patients MSI. ). Statistical analysis was performed using unpaired t-test and the p-value < 0.05 was considered significant. **(C)** Kaplan-Meier survival curve of *KRAS*<sup>MUT</sup> (n=268)-carrying patients from panel a. Patients were then split into four different groups. *RasGRP1* high; MSI (n=15) (red dash curve) *RasGRP1* high; MSS (171) (solid red curve), *RasGRP1* low; MSI (n=7) (black dash curve) and *RasGRP1* low; MSS (n=132) (solid black curve). All statistical analyses for Kaplan-Meier survival were done using *Log-rank (Mantel-Cox) Test*. \**p* < 0.05.

Gbenedio et al., Supplemental Figure 6

Supplemental Figure 6A

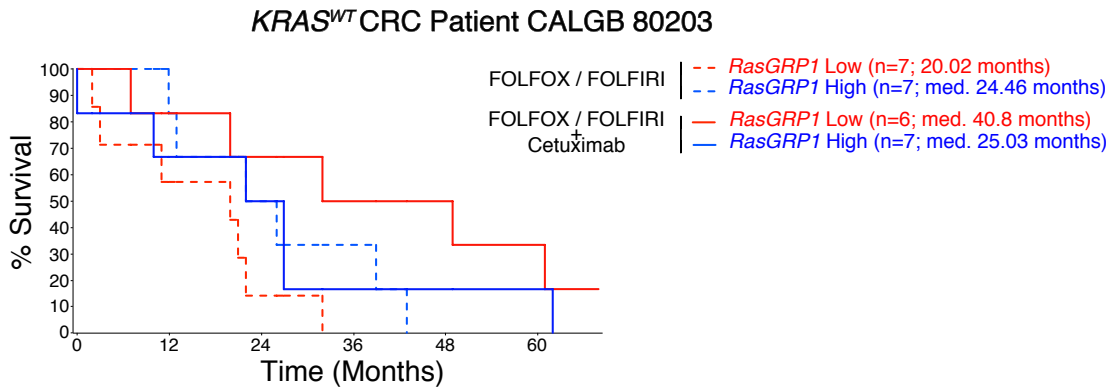

Supplemental Figure 6B

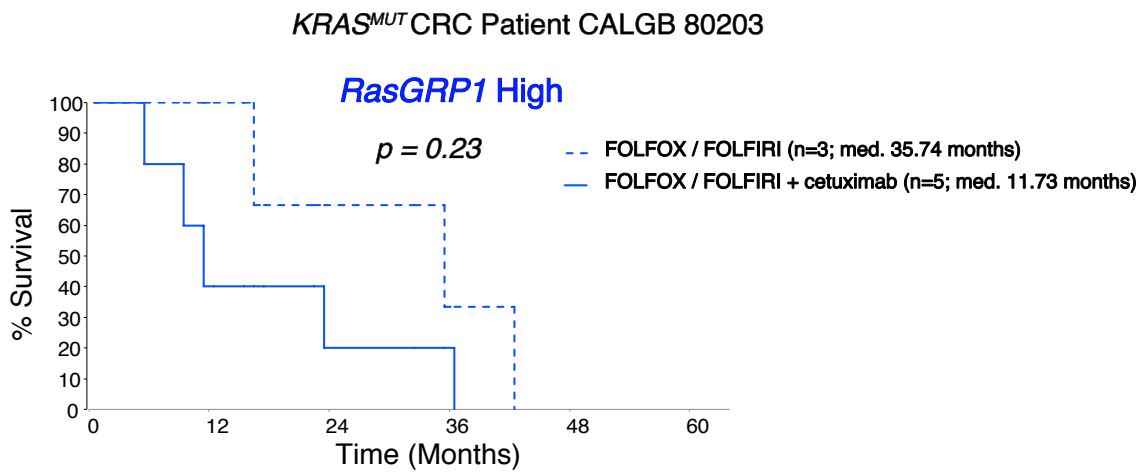

Supplemental Figure 6C

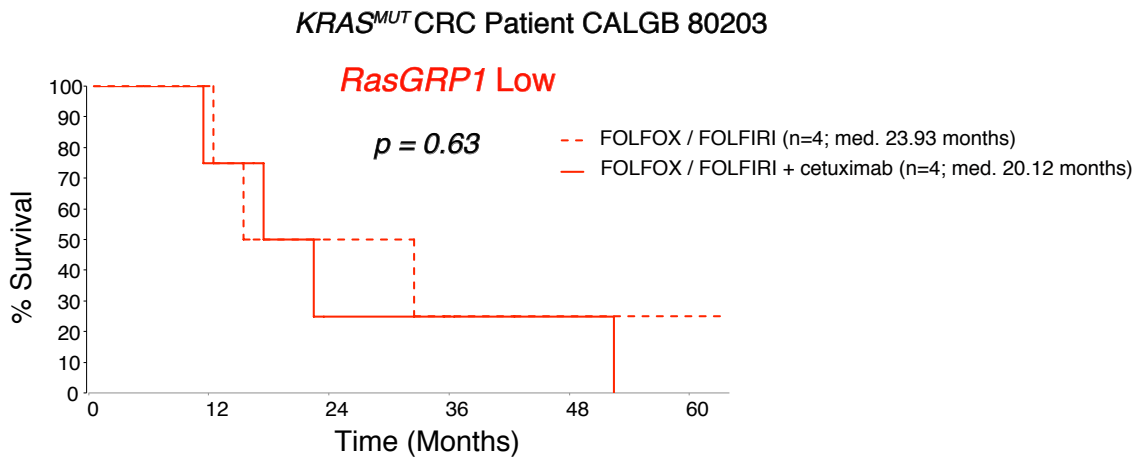

**Supplemental Figure 6: Patient survival data accompanying Figures 5E and 5F.**

(A) Summary of all the data in figs 5E and 5F. Comparison of FOLFOX/FOLFIRI chemotherapy (dashed lines) versus FOLFOX/FOLFIRI with cetuximab (solid lines) for the quartile of patients with highest *RasGRP1* expression in their tumors (“*RasGRP1* High” in blue) as well as the quartile of patients with lowest *RasGRP1* expression in their tumors (“*RasGRP1* Low” in red). Overall survival was graphed in a retrospective analysis of *KRAS*<sup>WT</sup> colorectal cancer patients enrolled in the CALG80203 trial.

(B and C) Comparison of FOLFOX/FOLFIRI chemotherapy (dashed lines) versus FOLFOX/FOLFIRI with cetuximab (solid lines) in colorectal cancer patients with *KRAS*<sup>MUT</sup> status who were enrolled in the CALG80203 trial. The quartile of patients with highest *RasGRP1* expression in their tumors (“*RasGRP1* High” in blue in B) as well as the quartile of patients with lowest *RasGRP1* expression in their tumors (“*RasGRP1* Low” in red in C) were analyzed. The p values indicate that there were no significant differences between the groups of *KRAS*<sup>MUT</sup> CRC patients.
